# Supplementary material
Source: publisher site journal article supplement (https://www.dovepress.com/get_supplementary_file.php?f=211569.xlsx)
Supplement: Supplementary file 1 [file get_supplementary_file.php]

## Sheet: Summary Report of all runs
	Supplementary Table 2: List of the different plasma proteins identified by LC-MS/MS
	This MS Excel File contains the report of LC-MS/MS Data Analysis done using Scaffold Software.
	The Sheet 1 named as "Summary Report of all runs" summarizes the report obtained from all the different LC-MS/MS runs.
	This Sheet contains information on identified proteins, their UniProt ID, Gene ID, Unique peptide Count, Percent Coverage, Protein Identification Probability, Total Spectral Count for all healthy and atopic asthma samples.
				Healthy				Atopic Asthma Patient
Sl. No	Identified Proteins (167)	UniProt_ID	Gene_ID	Unique Peptide Count	Percent Coverage	Protein Identification Probability	Total Spectral Count	Unique Peptide Count	Percent Coverage	Protein Identification Probability	Total Spectral Count
1	Fibrinogen alpha chain isoform alpha-E	P02671	2243	43	0.442	0.996	180	51	0.4778	1	203
2	Apolipoprotein A-II	P02652	336	10	0.595	1	32	12	0.55	1	41
3	Complement C3	P01024	718	99	0.4795	1	368	101	0.502	1	343
4	Apolipoprotein B	P04114	338	125	0.3633	1	169	125	0.3438	1	159
5	Alpha-2-macroglobulin isoform a	P01023	2	77	0.6258	1	246	81	0.6243	1	294
6	Pregnancy zone protein	P20742	5858	8	0.0635	0.38	45	8	0.0739	0.69	51
7	Apolipoprotein A-I	P02647	335	43	0.852	1	275	41	0.8593	1	282
8	Alpha-1B-glycoprotein	P04217	1	13	0.3945	1	23	14	0.4773	1	24
9	Transthyretin	E9KL36	7276	21	0.682	1	98	22	0.704	0.86	85
10	Beta-2-glycoprotein 1	P02749	350	11	0.4183	1	18	11	0.4153	1	22
11	Neurofilament heavy polypeptide	P12036	4744	0	0	0.07	0	2	0.0085	0.155	2
12	Histidine-rich glycoprotein	P04196	3273	10	0.2268	1	19	11	0.2275	1	18
13	Complement C4-A	P0C0L4	720	58	0.2518	1	129	62	0.292	1	131
14	Serotransferrin	P02787	7018	33	0	1	54	30	0	1	65
15	Serum amyloid P-component	P02743	325	8	0.309	1	16	10	0.3643	1	21
16	SAA2-SAA2 protein	A0A096LPE2	100528017	5	0.245	1	9	6	0.2655	1	13
17	Serum amyloid A-1 protein	P0DJI8	6288	6	0.5	1	7	3	0.3115	0.9975	4
18	Serum amyloid A-2 protein	P0DJI9	6289	3	0.344	0.46	4	4	0.2335	0.525	4
19	Angiotensinogen	P01019	183	9	0.249	1	13	9	0.2595	1	16
20	Alpha-1-acid glycoprotein 2	P19652	5005	7	0.3273	1	29	6	0.3123	1	22
21	Hemopexin	P02790	3263	24	0.546	0.994	65	22	0.4953	0.912	61
22	Serum paraoxonase/arylesterase 1	P27169	5444	10	0.3783	1	16	7	0.2888	1	12
23	Fibrinogen beta chain isoform 1	P02675	2244	31	0.5908	0.994	97	32	0.5875	1	117
24	Complement factor H	P08603	3075	35	0.312	1	48	33	0.3788	1	48
25	Titin isoform IC	A0A0A0MTS7	7273	4	0.0011	1	4	4	0.002	1	4
26	Retinol-binding protein 4	P02753	5950	6	0.3546	1	15	4	0.2356	1	7
27	Hemoglobin subunit beta	P68871	3043	7	0.4626	0.9975	24	7	0.522	1	9
28	Hemoglobin subunit delta	P02042	3045	5	0.3517	0.4	13	4	0.245	0.36	5
29	Hemoglobin subunit gamma-2	P69892	3048	1	0.068	0.04	4	1	0.068	0.17	1
30	Vitamin D-binding protein	P02774	2638	15	0.335	1	38	16	0.3788	0.98	37
31	Complement C5	P01031	727	16	0.1028	1	19	19	0.1224	1	24
32	Hemoglobin subunit alpha	P69905	3039	7	0.4965	1	21	3	0.3383	1	5
33	Complement C1q subcomponent subunit B	P02746	713	6	0.2857	1	10	6	0.2463	1	10
34	Fibronectin isoform 3	P02751	2335	21	0.1446	1	24	35	0.233	1	43
35	Complement C1q subcomponent subunit C	P02747	714	5	0.2365	1	9	5	0.2468	1	9
36	Apolipoprotein C-I	P02654	341	5	0.3315	1	6	4	0.2955	0.97	8
37	Mucin-19	Q7Z5P9	283463	3	0.0033	1	3	0	0	0	0
38	Kininogen-1	P01042	3827	14	0.3615	0.99	23	11	0.329	0.98	20
39	Inter-alpha-trypsin inhibitor heavy chain H1	P19827	3697	15	0.2523	1	24	13	0.2075	0.93	23
40	Complement factor H-related protein 2	P36980	3080	5	0.2498	0.94	7	3	0.1453	0.82	5
41	Complement factor H-related protein 1	Q03591	3078	8	0.2955	0.96	10	5	0.1456	0.74	8
42	Alpha-1-antichymotrypsin	P01011	12	16	0.3978	1	42	16	0.3828	0.99	42
43	Apolipoprotein A-IV	P06727	337	31	0.6585	1	65	24	0.5855	1	39
44	Inter-alpha-trypsin inhibitor heavy chain H2	P19823	3698	22	0.328	0.99	40	21	0.32	1	39
45	Gelsolin	P06396	2934	15	0.2855	1	23	15	0.254	1	22
46	Fibrinogen gamma chain	P02679	2266	24	0.5975	1	91	26	0.5955	1	121
47	Ficolin-3	O75636	8547	4	0.1706	1	6	5	0.1724	1	4
48	Alpha-2-HS-glycoprotein	P02765	197	9	0.3308	0.99	22	9	0.3418	0.89	26
49	Complement factor B	P00751	629	21	0.3198	1	34	19	0.3098	0.98	29
50	Haptoglobin	P00738	3240	2	0.0419	0.8	2	8	0.1633	0.76	22
51	Haptoglobin-related protein	P00739	3250	1	0.023	0.08	1	5	0.0776	0.59	12
52	Antithrombin-III	P01008	462	19	0.3923	1	37	17	0.3813	1	33
53	Plasminogen	P00747	5340	19	0.2788	1	27	16	0.3203	0.99	23
54	Plasminogen-like protein B	Q02325	5343	1	0.09395	0.01	1	1	0.115	0.18	1
55	Apolipoprotein M	O95445	55937	2	0.1264	1	4	2	0.162225	1	3
56	Ceruloplasmin	P00450	1356	35	0.4173	1	68	39	0.442	1	79
57	N-acetylmuramoyl-L-alanine amidase	Q96PD5	114770	7	0.2313	1	9	7	0.2508	0.92	9
58	Complement C1q subcomponent subunit A	P02745	712	3	0.1567	1	4	3	0.15	1	6
59	Carbonic anhydrase 1	P00915	759	6	0.3064	1	10	6	0.3048	1	9
60	Complement factor I	P05156	3426	8	0.119	1	9	5	0.1051	0.97	5
61	Inter-alpha-trypsin inhibitor heavy chain H4	Q14624	3700	24	0.2763	1	46	27	0.3468	1	48
62	Apolipoprotein E	P02649	348	17	0.5418	1	34	15	0.548	0.97	26
63	Complement component C6	P13671	729	8	0.1181	1	10	7	0.1116	1	9
64	Apolipoprotein a	P08519	4018	2	0.0119	1	2	2	0.0134	0.82	3
65	Platelet basic protein	P02775	5473	3	0.255	1	4	3	0.2755	1	5
66	Proteoglycan 4	Q92954	10216	2	0.0226	1	3	2	0.02	1	3
67	Apolipoprotein L1	O14791	8542	4	0.1885	0.98	6	4	0.1742	0.77	5
68	Apolipoprotein C-II	P02655	344	5	0.4455	1	6	5	0.53	1	7
69	Complement factor D	P00746	1675	3	0.2245	1	3	4	0.2965	1	5
70	Vitronectin	P04004	7448	8	0.1748	0.8	12	7	0.1495	0.82	11
71	Prothrombin	P00734	2147	16	0.2638	1	22	10	0.2255	1	13
72	Plasma kallikrein	P03952	3818	5	0.0784	1	6	2	0.0384	0.99	2
73	Dermcidin	P81605	117159	2	0.2367	1	4	3	0.2275	1	4
74	Plasma protease C1 inhibitor	P05155	710	12	0.226	1	24	13	0.238	1	20
75	POTE ankyrin domain family member E	Q6S8J3	445582	3	0.0353	0.13	3	2	0.0298	0.2	3
76	Actin, cytoplasmic 2	P63261	71	6	0	1	7	2	0	0.98	2
77	POTE ankyrin domain family member F	A5A3E0	728378	4	0.0353	0.46	4	2	0.0298	0.34	2
78	POTE ankyrin domain family member I	P0CG38	653269	2	0.0205	0.11	2	1	0.0149	0.15	2
79	POTE ankyrin domain family member J	P0CG39	653781	2	0	0.16	2	1	0	0.57	1
80	Actin, aortic smooth muscle	P62736	59	4	0	0.49	4	1	0	0.05	1
81	Beta-2-microglobulin	P61769	567	2	0.1737	0.99	2	2	0.2375	0.94	3
82	Protein AMBP	P02760	259	8	0.233	0.82	11	7	0.2095	0.89	10
83	Tetranectin	P05452	7123	5	0.3833	0.79	9	5	0.4095	0.92	5
84	Apolipoprotein C-III	P02656	345	2	0.2357	1	3	3	0.3685	1	5
85	Complement component C8 gamma chain	P07360	733	7	0.4423	0.84	10	5	0.373	0.95	8
86	Hornerin	Q86YZ3	388697	2	0.0103	1	2	2	0.0091	0.99	2
87	Alpha-2-antiplasmin	P08697	5345	9	0.2753	1	12	9	0.2828	1	11
88	Complement C1s subcomponent	P09871	716	6	0.1065	1	7	6	0.0988	0.98	7
89	Mannan-binding lectin serine protease 1	P48740	5648	1	0.0211	0.02	1	0	0	0	0
90	Alpha-1-antitrypsin	P01009	5265	4	0	1	4	10	0	1	10
91	Insulin-like growth factor-binding protein 3	P17936	3486	2	0.0546	0.92	2	2	0.0793	1	3
92	Ryanodine receptor 2	Q92736	6262	2	0.004	0.97	2	1	0.0016	0.94	1
93	Clusterin	P10909	1191	12	0.2873	1	23	11	0.2998	1	18
94	Complement C2	P06681	717	3	0.0258	0.94	3	2	0.0589	1	3
95	Cystatin-C	P01034	1471	1	0.1119	1	2	2	0.1628	1	3
96	Complement component C7	P10643	730	2	0.0407	0.76	3	2	0.0565	0.98	3
97	Complement C1r subcomponent	P00736	715	3	0	0.98	4	2	0	0.62	4
98	Apolipoprotein C-IV	P55056	346	3	0.181	1	5	4	0.283	1	6
99	Inter-alpha-trypsin inhibitor heavy chain H3	Q06033	3699	4	0.0722	0.92	5	6	0.0954	1	8
100	Zinc-alpha-2-glycoprotein	P25311	563	12	0.4515	1	20	8	0.2993	0.96	13
101	Carboxypeptidase N catalytic chain	P15169	1369	3	0.107	1	3	1	0.0357	0.9	1
102	Platelet factor 4	P02776	5196	2	0.257	1	3	2	0.218	1	2
103	Afamin	P43652	173	9	0.162	1	12	7	0.165	1	9
104	Pigment epithelium-derived factor	P36955	5176	6	0.223	0.99	9	5	0.1772	0.77	7
105	Lysozyme C	P61626	4069	1	0.0811	0.99	1	2	0.2246	0.99	2
106	Insulin-like growth factor-binding protein complex acid labile subunit	P35858	3483	4	0.0884	0.95	5	2	0.0716	0.72	3
107	Coagulation factor IX	P00740	2158	4	0.0901	1	5	1	0.0195	0.99	1
108	Corticosteroid-binding globulin	P08185	866	2	0.0772	0.83	2	2	0.0683	0.99	2
109	Serum albumin	P02768	213	7	0.0501	0.99	9	4	0.0501	1	9
110	Phosphatidylinositol-glycan-specific phospholipase D	P80108	2822	2	0.0357	0.97	2	2	0.0268	0.87	2
111	C-reactive protein	P02741	1401	1	0.0446	1	1	6	0.219	1	7
112	Vitamin K-dependent protein C	P04070	5624	2	0.075	1	3	2	0.0271	1	2
113	Heparin cofactor 2	P05546	3053	6	0.1453	0.98	7	9	0.1595	1	10
114	Lumican	P51884	4060	4	0.1078	0.83	5	5	0.1369	0.65	6
115	Complement component C8 alpha chain	P07357	731	2	0.0445	0.65	2	2	0.0604	0.76	3
116	Collagen alpha-2(V) chain	P05997	1290	0	0	0	0	3	0.0437	1	3
117	Myb-related protein A	P10243	4603	2	0.0346	1	2	2	0.0226	0.98	2
118	Carboxypeptidase N subunit 2	P22792	1370	2	0.0798	0.72	3	2	0.0813	0.47	2
119	Sex hormone-binding globulin	P04278	6462	2	0.1053	1	3	3	0.1433	0.97	3
120	Carbonic anhydrase 2	P00918	760	4	0.215	1	4	4	0.192	1	5
121	Collagen alpha-2(IV) chain	P08572	1284	0	0	0	0	2	0.0228	1	2
122	Protein S100-A8	P05109	6279	1	0.131	1	1	1	0.1175	0.99	1
123	Complement component C9	P02748	735	6	0.1127	1	7	8	0.1703	1	9
124	LON peptidase N-terminal domain and RING finger protein 3	Q496Y0	79836	2	0.0191	0.81	2	1	0.0105	0.51	1
125	Protein Z-dependent protease inhibitor	Q9UK55	51156	1	0.0465	0.99	1	2	0.0631	1	2
126	Alpha-1-acid glycoprotein 1	P02763	5004	9	0.3788	0.99	45	8	0.3595	0.97	32
127	L-lactate dehydrogenase A chain	P00338	3939	1	0.0332	0.94	1	0	0	0	0
128	L-lactate dehydrogenase B chain	P07195	3945	2	0.0554	0.68	2	0	0	0	0
129	L-lactate dehydrogenase C chain	P07864	3948	1	0.0361	0.05	1	0	0	0	0
130	Apolipoprotein F	Q13790	319	1	0.0542	1	1	2	0.0799	1	2
131	Prostaglandin-H2 D-isomerase	P41222	5730	3	0.258	1	3	2	0.168	1	2
132	eIF-2-alpha kinase activator GCN1	Q92616	10985	0	0	0	0	2	0.0082	1	2
133	Plasma serine protease	P05154	5104	2	0.0432	1	2	2	0.0431	1	2
134	Apolipoprotein D	P05090	347	6	0.2965	0.98	12	5	0.2408	0.92	7
135	Complement component C8 beta chain	P07358	732	4	0.0577	0.65	4	3	0.0508	0.91	3
136	Kallistatin	P29622	5267	3	0.0725	0.82	3	3	0.0989	0.7	3
137	Lipopolysaccharide-binding protein	P18428	3929	2	0.0769	0.55	2	1	0.0423	0.98	2
138	Extracellular matrix protein 1	Q16610	1893	2	0.0309	0.68	2	1	0.0229	0.77	1
139	Adiponectin	Q15848	9370	2	0.123	1	2	2	0.0923	1	2
140	nudC domain-containing protein 2	Q8WVJ2	134492	1	0.121	1	1	2	0.268	1	2
141	Leucine-rich alpha-2-glycoprotein	P02750	116844	5	0.207	0.98	7	5	0.269	1	8
142	Coagulation factor XII	P00748	2161	3	0.0744	0.86	3	3	0.0732	0.74	3
143	Attractin	O75882	8455	3	0.0303	1	3	1	0.0159	0.91	1
144	Cysteine-rich secretory protein 3	P54108	10321	2	0.0933	1	2	2	0.0783	1	2
145	CD5 antigen-like isoform 2	O43866	922	4	0.176	1	4	1	0.0403	1	1
146	Fibulin-1	P23142	2192	2	0	1	3	5	0	1	5
147	Intraflagellar transport protein 74 homolog	Q96LB3	80173	2	0.0717	1	2	0	0	0	0
148	Cystatin-A	P01040	1475	2	0.122	0.72	2	2	0.4285	0.74	2
149	Spectrin beta chain, non-erythrocytic 4 isoform sigma1	Q9H254	57731	0	0	0	0	2	0.0199	1	2
150	Complement factor H-related protein 3	Q02985	10878	2	0.078	0.66	3	2	0.0521	0.27	3
151	Glutathione peroxidase 3	P22352	2878	2	0.169	0.87	3	3	0.1915	0.88	4
152	Thyroxine-binding globulin	P05543	6906	3	0.071	0.72	3	3	0.106	0.9	3
153	Tyrosine-protein kinase PRAG1	Q86YV5	157285	2	0.0405	1	2	0	0	0	0
154	14-3-3 protein zeta/delta	P63104	7534	2	0.106	1	2	3	0.18	1	3
155	Immunoglobulin lambda-like polypeptide 5	B9A064	100423062	0	0	0	0	4	0	1	5
156	Hepatocyte growth factor activator	Q04756	3083	2	0.0473	1	2	0	0	0	0
157	Histone-lysine N-methyltransferase 2A	Q03164	4297	0	0	0	0	2	0.0053	1	2
158	Serum paraoxonase/lactonase 3	Q15166	5446	3	0.0855	1	4	1	0.032	0.12	3
159	Complement C1r subcomponent-like protein	Q9NZP8	51279	2	0.026	0.48	2	2	0.0507	0.41	2
160	Neutrophil defensin 1	P59665	1667	1	0.0957	0.42	1	2	0.1434	0.85	2
161	Neutrophil defensin 3	P59666	1668	1	0.0957	0.05	1	2	0.1434	0.11	2
162	Hepatocyte growth factor-like protein	P26927	4485	2	0.0414	1	3	0	0	0	0
163	Out at first protein homolog	Q86UD1	220323	0	0	0	0	2	0.0879	1	2
164	Mannose-binding protein C	P11226	4153	1	0.0524	0.02	1	3	0	1	3
165	Hyaluronan-binding protein 2	Q14520	3026	0	0	0	0	2	0.0543	1	2
166	Carboxypeptidase N catalytic chain	P15169	1369	0	0	0	0	2	0	1	2
167	Biotinidase	P43251	686	2	0.0239	0.51	2	1	0.0239	0.01	1

## Sheet: Run1
	This MS Excel File contains the report of LC-MS/MS Data Analysis done using Scaffold Software.
	The Sheet 2 named as "Run1" provides the report obtained from the first LC-MS/MS run.
	This Sheet contains information on identified proteins, their UniProt ID, Gene ID, Unique peptide Count, Percent Coverage, Protein Identification Probability, Total Spectral Count for Healthy Sample (1H) and for Atopic asthma patient sample (1A).
	Note: No percentage coverage information was obtained on using the database in Scaffold for the data analysis.
				Healthy (1H)				Atopic Asthma Patient (1A)
Sl. No	Identified Proteins (167)	UniProt_ID	Gene_ID	Unique Peptide Count	Percent Coverage	Protein Identification Probability	Total Spectral Count	unique Peptide Count	Percent Coverage	Protein Identification Probability	Total Spectral Count
1	Fibrinogen alpha chain isoform alpha-E	P02671	2243	30		0.98	130	28		1	145
2	Apolipoprotein A-II	P02652	336	0		0	0	0		0	0
3	Complement C3	P01024	718	91		1	287	85		1	299
4	Apolipoprotein B	P04114	338	102		1	126	148		1	205
5	Alpha-2-macroglobulin isoform a	P01023	2	0		0	0	0		0	0
6	Pregnancy zone protein	P20742	5858	7		0.51	46	7		0.82	34
7	Apolipoprotein A-I	P02647	335	37		1	206	30		1	131
8	Alpha-1B-glycoprotein	P04217	1	16		1	36	10		1	22
9	Transthyretin	E9KL36	7276	12		1	44	10		0.28	26
10	Beta-2-glycoprotein 1	P02749	350	0		0	0	0		0	0
11	Neurofilament heavy polypeptide	P12036	4744	0		0	0	0		0	0
12	Histidine-rich glycoprotein	P04196	3273	0		0	0	0		0	0
13	Complement C4-A	P0C0L4	720	58		1	130	56		1	130
14	Serotransferrin	P02787	7018	33		1	54	30		1	65
15	Serum amyloid P-component	P02743	325	0		0	0	0		0	0
16	SAA2-SAA2 protein	A0A096LPE2	100528017	0		0	0	0		0	0
17	Serum amyloid A-1 protein	P0DJI8	6288	0		0	0	0		0	0
18	Serum amyloid A-2 protein	P0DJI9	6289	0		0	0	0		0	0
19	Angiotensinogen	P01019	183	0		0	0	0		0	0
20	Alpha-1-acid glycoprotein 2	P19652	5005	0		0	0	0		0	0
21	Hemopexin	P02790	3263	22		0.97	91	16		0.56	47
22	Serum paraoxonase/arylesterase 1	P27169	5444	0		0	0	0		0	0
23	Fibrinogen beta chain isoform 1	P02675	2244	31		0.97	113	24		1	98
24	Complement factor H	P08603	3075	34		1	49	21		1	29
25	Titin isoform IC	A0A0A0MTS7	7273	0		0	0	0		0	0
26	Retinol-binding protein 4	P02753	5950	0		0	0	0		0	0
27	Hemoglobin subunit beta	P68871	3043	0		0	0	0		0	0
28	Hemoglobin subunit delta	P02042	3045	4		0.16	5	5		0.33	6
29	Hemoglobin subunit gamma-2	P69892	3048	0		0	0	0		0	0
30	Vitamin D-binding protein	P02774	2638	14		1	41	8		0.91	20
31	Complement C5	P01031	727	7		0.99	9	17		1	28
32	Hemoglobin subunit alpha	P69905	3039	0		0	0	0		0	0
33	Complement C1q subcomponent subunit B	P02746	713	0		0	0	0		0	0
34	Fibronectin isoform 3	P02751	2335	15		1	19	33		1	46
35	Complement C1q subcomponent subunit C	P02747	714	0		0	0	0		0	0
36	Apolipoprotein C-I	P02654	341	0		0	0	0		0	0
37	Mucin-19	Q7Z5P9	283463	5		1	5	0		0	0
38	Kininogen-1	P01042	3827	11		0.97	26	8		0.88	12
39	Inter-alpha-trypsin inhibitor heavy chain H1	P19827	3697	10		1	14	11		0.67	21
40	Complement factor H-related protein 2	P36980	3080	0		0	0	0		0	0
41	Complement factor H-related protein 1	Q03591	3078	0		0	0	0		0	0
42	Alpha-1-antichymotrypsin	P01011	12	18		1	56	13		0.95	52
43	Apolipoprotein A-IV	P06727	337	29		1	68	20		1	25
44	Inter-alpha-trypsin inhibitor heavy chain H2	P19823	3698	19		0.93	36	20		1	30
45	Gelsolin	P06396	2934	12		0.99	29	16		1	29
46	Fibrinogen gamma chain	P02679	2266	23		1	92	24		1	91
47	Ficolin-3	O75636	8547	0		0	0	0		0	0
48	Alpha-2-HS-glycoprotein	P02765	197	8		0.97	21	4		0.45	9
49	Complement factor B	P00751	629	22		1	43	12		0.92	21
50	Haptoglobin	P00738	3240	3		0.99	3	16		1	57
51	Haptoglobin-related protein	P00739	3250	1		0.1	1	11		1	31
52	Antithrombin-III	P01008	462	21		1	53	16		1	28
53	Plasminogen	P00747	5340	29		1	43	8		0.95	12
54	Plasminogen-like protein B	Q02325	5343	0		0	0	0		0	0
55	Apolipoprotein M	O95445	55937	0		0	0	0		0	0
56	Ceruloplasmin	P00450	1356	35		1	79	35		1	83
57	N-acetylmuramoyl-L-alanine amidase	Q96PD5	114770	7		1	8	5		0.61	7
58	Complement C1q subcomponent subunit A	P02745	712	0		0	0	0		0	0
59	Carbonic anhydrase 1	P00915	759	0		0	0	0		0	0
60	Complement factor I	P05156	3426	6		1	9	2		0.89	2
61	Inter-alpha-trypsin inhibitor heavy chain H4	Q14624	3700	26		1	56	27		1	55
62	Apolipoprotein E	P02649	348	19		1	35	12		0.84	23
63	Complement component C6	P13671	729	9		1	13	7		1	8
64	Apolipoprotein a	P08519	4018	0		0	0	0		0	0
65	Platelet basic protein	P02775	5473	0		0	0	0		0	0
66	Proteoglycan 4	Q92954	10216	0		0	0	0		0	0
67	Apolipoprotein L1	O14791	8542	3		0.92	5	2		0.14	3
68	Apolipoprotein C-II	P02655	344	0		0	0	0		0	0
69	Complement factor D	P00746	1675	0		0	0	0		0	0
70	Vitronectin	P04004	7448	5		0.01	11	3		0.06	5
71	Prothrombin	P00734	2147	23		1	35	7		1	9
72	Plasma kallikrein	P03952	3818	0		0	0	0		0	0
73	Dermcidin	P81605	117159	0		0	0	0		0	0
74	Plasma protease C1 inhibitor	P05155	710	15		1	33	16		1	28
75	POTE ankyrin domain family member E	Q6S8J3	445582	0		0	0	0		0	0
76	Actin, cytoplasmic 2	P63261	71	6		1	7	2		0.98	2
77	POTE ankyrin domain family member F	A5A3E0	728378	4		0.81	4	1		0.77	1
78	POTE ankyrin domain family member I	P0CG38	653269	0		0	0	0		0	0
79	POTE ankyrin domain family member J	P0CG39	653781	2		0.16	2	1		0.57	1
80	Actin, aortic smooth muscle	P62736	59	4		0.49	4	1		0.05	1
81	Beta-2-microglobulin	P61769	567	0		0	0	0		0	0
82	Protein AMBP	P02760	259	3		0.09	7	4		0.47	5
83	Tetranectin	P05452	7123	1		0.15	1	3		0.75	3
84	Apolipoprotein C-III	P02656	345	0		0	0	0		0	0
85	Complement component C8 gamma chain	P07360	733	4		0.35	6	3		0.78	3
86	Hornerin	Q86YZ3	388697	0		0	0	0		0	0
87	Alpha-2-antiplasmin	P08697	5345	0		0	0	0		0	0
88	Complement C1s subcomponent	P09871	716	8		1	11	5		1	5
89	Mannan-binding lectin serine protease 1	P48740	5648	0		0	0	0		0	0
90	Alpha-1-antitrypsin	P01009	5265	4		1	4	10		1	10
91	Insulin-like growth factor-binding protein 3	P17936	3486	0		0	0	0		0	0
92	Ryanodine receptor 2	Q92736	6262	0		0	0	0		0	0
93	Clusterin	P10909	1191	12		1	23	7		1	13
94	Complement C2	P06681	717	5		1	7	3		1	3
95	Cystatin-C	P01034	1471	0		0	0	0		0	0
96	Complement component C7	P10643	730	1		0.86	1	1		0.93	1
97	Complement C1r subcomponent	P00736	715	7		1	8	4		1	7
98	Apolipoprotein C-IV	P55056	346	0		0	0	0		0	0
99	Inter-alpha-trypsin inhibitor heavy chain H3	Q06033	3699	3		0.62	4	6		1	10
100	Zinc-alpha-2-glycoprotein	P25311	563	11		1	20	7		1	13
101	Carboxypeptidase N catalytic chain	P15169	1369	0		0	0	0		0	0
102	Platelet factor 4	P02776	5196	0		0	0	0		0	0
103	Afamin	P43652	173	15		1	17	4		0.99	4
104	Pigment epithelium-derived factor	P36955	5176	6		0.93	10	6		0.61	7
105	Lysozyme C	P61626	4069	0		0	0	0		0	0
106	Insulin-like growth factor-binding protein complex acid labile subunit	P35858	3483	6		1	6	1		0.17	2
107	Coagulation factor IX	P00740	2158	0		0	0	0		0	0
108	Corticosteroid-binding globulin	P08185	866	3		0.99	3	3		1	4
109	Serum albumin	P02768	213	14		1	17	7		1	12
110	Phosphatidylinositol-glycan-specific phospholipase D	P80108	2822	0		0	0	2		0.61	2
111	C-reactive protein	P02741	1401	0		0	0	0		0	0
112	Vitamin K-dependent protein C	P04070	5624	0		0	0	0		0	0
113	Heparin cofactor 2	P05546	3053	5		0.94	8	12		1	17
114	Lumican	P51884	4060	7		1	7	7		1	8
115	Complement component C8 alpha chain	P07357	731	3		0.55	4	1		0.14	1
116	Collagen alpha-2(V) chain	P05997	1290	0		0	0	0		0	0
117	Myb-related protein A	P10243	4603	0		0	0	0		0	0
118	Carboxypeptidase N subunit 2	P22792	1370	0		0	0	0		0	0
119	Sex hormone-binding globulin	P04278	6462	0		0	0	2		0.86	2
120	Carbonic anhydrase 2	P00918	760	0		0	0	0		0	0
121	Collagen alpha-2(IV) chain	P08572	1284	0		0	0	0		0	0
122	Protein S100-A8	P05109	6279	0		0	0	0		0	0
123	Complement component C9	P02748	735	9		1	12	9		1	12
124	LON peptidase N-terminal domain and RING finger protein 3	Q496Y0	79836	0		0	0	0		0	0
125	Protein Z-dependent protease inhibitor	Q9UK55	51156	0		0	0	0		0	0
126	Alpha-1-acid glycoprotein 1	P02763	5004	8		0.93	38	9		0.88	20
127	L-lactate dehydrogenase A chain	P00338	3939	0		0	0	0		0	0
128	L-lactate dehydrogenase B chain	P07195	3945	0		0	0	0		0	0
129	L-lactate dehydrogenase C chain	P07864	3948	0		0	0	0		0	0
130	Apolipoprotein F	Q13790	319	0		0	0	0		0	0
131	Prostaglandin-H2 D-isomerase	P41222	5730	0		0	0	0		0	0
132	eIF-2-alpha kinase activator GCN1	Q92616	10985	0		0	0	0		0	0
133	Plasma serine protease	P05154	5104	0		0	0	0		0	0
134	Apolipoprotein D	P05090	347	5		0.92	10	4		0.65	5
135	Complement component C8 beta chain	P07358	732	6		0.99	7	3		1	3
136	Kallistatin	P29622	5267	1		0	1	1		0	1
137	Lipopolysaccharide-binding protein	P18428	3929	1		0.1	1	2		0.98	3
138	Extracellular matrix protein 1	Q16610	1893	3		1	3	1		0.72	1
139	Adiponectin	Q15848	9370	0		0	0	0		0	0
140	nudC domain-containing protein 2	Q8WVJ2	134492	0		0	0	0		0	0
141	Leucine-rich alpha-2-glycoprotein	P02750	116844	8		0.99	11	5		1	5
142	Coagulation factor XII	P00748	2161	3		1	3	2		0.78	2
143	Attractin	O75882	8455	0		0	0	1		0.93	1
144	Cysteine-rich secretory protein 3	P54108	10321	0		0	0	0		0	0
145	CD5 antigen-like isoform 2	O43866	922	0		0	0	0		0	0
146	Fibulin-1	P23142	2192	2		1	3	5		1	5
147	Intraflagellar transport protein 74 homolog	Q96LB3	80173	0		0	0	0		0	0
148	Cystatin-A	P01040	1475	2		0.75	2	1		0.23	1
149	Spectrin beta chain, non-erythrocytic 4 isoform sigma1	Q9H254	57731	0		0	0	0		0	0
150	Complement factor H-related protein 3	Q02985	10878	0		0	0	0		0	0
151	Glutathione peroxidase 3	P22352	2878	1		0.91	1	2		0.99	2
152	Thyroxine-binding globulin	P05543	6906	2		0.99	2	2		0.98	2
153	Tyrosine-protein kinase PRAG1	Q86YV5	157285	0		0	0	0		0	0
154	14-3-3 protein zeta/delta	P63104	7534	0		0	0	0		0	0
155	Immunoglobulin lambda-like polypeptide 5	B9A064	100423062	0		0	0	4		1	5
156	Hepatocyte growth factor activator	Q04756	3083	0		0	0	0		0	0
157	Histone-lysine N-methyltransferase 2A	Q03164	4297	0		0	0	0		0	0
158	Serum paraoxonase/lactonase 3	Q15166	5446	0		0	0	0		0	0
159	Complement C1r subcomponent-like protein	Q9NZP8	51279	3		0.88	4	2		0.53	2
160	Neutrophil defensin 1	P59665	1667	0		0	0	0		0	0
161	Neutrophil defensin 3	P59666	1668	0		0	0	0		0	0
162	Hepatocyte growth factor-like protein	P26927	4485	0		0	0	0		0	0
163	Out at first protein homolog	Q86UD1	220323	0		0	0	0		0	0
164	Mannose-binding protein C	P11226	4153	0		0	0	3		1	3
165	Hyaluronan-binding protein 2	Q14520	3026	0		0	0	0		0	0
166	Carboxypeptidase N catalytic chain	P15169	1369	0		0	0	2		1	2
167	Biotinidase	P43251	686	2		1	2	0		0	0

## Sheet: Run2(a)
	This MS Excel File contains the report of LC-MS/MS Data Analysis done using Scaffold Software.
	The Sheet 3 named as "Run2(a)" provides the report obtained from the first part of the second LC-MS/MS run.
	This Sheet contains information on identified proteins, their UniProt ID, Gene ID, Unique peptide Count, Percent Coverage, Protein Identification Probability, Total Spectral Count for Healthy Sample (2H) and for Atopic asthma patient sample (2A).
				Healthy (2H)				Atopic Asthma Patient (2A)
Sl. No	Identified Proteins (167)	UniProt_ID	Gene_ID	Unique Peptide Count	Percent Coverage	Protein Identification Probability	Total Spectral Count	unique Peptide Count	Percent Coverage	Protein Identification Probability	Total Spectral Count
1	Fibrinogen alpha chain isoform alpha-E	P02671	2243	45	0.455	1	207	77	0.434	1	257
2	Apolipoprotein A-II	P02652	336	14	0.72	1	41	24	0.74	1	64
3	Complement C3	P01024	718	114	0.566	1	525	120	0.499	1	428
4	Apolipoprotein B	P04114	338	183	0.537	1	274	157	0.462	1	203
5	Alpha-2-macroglobulin isoform a	P01023	2	92	0.712	1	441	93	0.7	1	422
6	Pregnancy zone protein	P20742	5858	9	0.0628	0.43	71	10	0.0843	1	74
7	Apolipoprotein A-I	P02647	335	43	0.824	1	280	46	0.846	1	378
8	Alpha-1B-glycoprotein	P04217	1	11	0.41	1	20	15	0.471	1	27
9	Transthyretin	E9KL36	7276	31	0.735	1	137	46	0.823	1	167
10	Beta-2-glycoprotein 1	P02749	350	10	0.446	1	19	7	0.255	1	8
11	Neurofilament heavy polypeptide	P12036	4744	0	0	0	0	0	0	0	0
12	Histidine-rich glycoprotein	P04196	3273	14	0.24	1	37	10	0.158	1	17
13	Complement C4-A	P0C0L4	720	64	0.298	1	147	74	0.361	1	172
14	Serotransferrin	P02787	7018	0	0	0	0	0	0	0	0
15	Serum amyloid P-component	P02743	325	13	0.466	1	37	13	0.475	1	39
16	SAA2-SAA2 protein	A0A096LPE2	100528017	6	0.341	1	13	6	0.269	1	25
17	Serum amyloid A-1 protein	P0DJI8	6288	6	0.5	1	7	8	0.533	1	12
18	Serum amyloid A-2 protein	P0DJI9	6289	3	0.344	0.46	4	6	0.352	1	7
19	Angiotensinogen	P01019	183	7	0.258	1	14	12	0.355	1	18
20	Alpha-1-acid glycoprotein 2	P19652	5005	9	0.403	1	51	10	0.448	1	52
21	Hemopexin	P02790	3263	28	0.636	1	81	25	0.366	1	46
22	Serum paraoxonase/arylesterase 1	P27169	5444	13	0.496	1	26	12	0.538	1	24
23	Fibrinogen beta chain isoform 1	P02675	2244	33	0.721	1	105	39	0.611	1	123
24	Complement factor H	P08603	3075	47	0.389	1	76	39	0.377	1	62
25	Titin isoform IC	A0A0A0MTS7	7273	1	0.0009	1	1	0	0	0	0
26	Retinol-binding protein 4	P02753	5950	3	0.0995	1	4	1	0.0498	1	1
27	Hemoglobin subunit beta	P68871	3043	9	0.769	1	11	10	0.748	1	17
28	Hemoglobin subunit delta	P02042	3045	4	0.32	0.43	5	6	0.381	0.57	10
29	Hemoglobin subunit gamma-2	P69892	3048	1	0.068	0.05	1	1	0.068	0.04	1
30	Vitamin D-binding protein	P02774	2638	16	0.314	1	37	13	0.223	1	33
31	Complement C5	P01031	727	25	0.144	1	34	22	0.131	1	28
32	Hemoglobin subunit alpha	P69905	3039	4	0.345	1	5	7	0.641	1	12
33	Complement C1q subcomponent subunit B	P02746	713	7	0.32	1	14	9	0.447	1	23
34	Fibronectin isoform 3	P02751	2335	38	0.246	1	49	45	0.296	1	59
35	Complement C1q subcomponent subunit C	P02747	714	5	0.253	1	11	5	0.253	1	12
36	Apolipoprotein C-I	P02654	341	7	0.41	1	8	5	0.386	1	10
37	Mucin-19	Q7Z5P9	283463	1	0.0033	1	1	0	0	0	0
38	Kininogen-1	P01042	3827	15	0.326	1	25	14	0.286	1	28
39	Inter-alpha-trypsin inhibitor heavy chain H1	P19827	3697	28	0.473	1	53	20	0.363	1	36
40	Complement factor H-related protein 2	P36980	3080	4	0.185	1	7	5	0.27	1	11
41	Complement factor H-related protein 1	Q03591	3078	5	0.112	0.85	8	4	0.185	0.95	11
42	Alpha-1-antichymotrypsin	P01011	12	18	0.492	1	42	20	0.392	1	44
43	Apolipoprotein A-IV	P06727	337	32	0.677	1	70	34	0.684	1	53
44	Inter-alpha-trypsin inhibitor heavy chain H2	P19823	3698	29	0.443	1	64	25	0.372	1	50
45	Gelsolin	P06396	2934	13	0.244	1	22	16	0.251	1	25
46	Fibrinogen gamma chain	P02679	2266	27	0.673	1	88	33	0.508	1	110
47	Ficolin-3	O75636	8547	5	0.194	1	5	7	0.324	1	8
48	Alpha-2-HS-glycoprotein	P02765	197	8	0.387	1	26	7	0.248	1	18
49	Complement factor B	P00751	629	15	0.317	1	32	18	0.208	1	29
50	Haptoglobin	P00738	3240	2	0.0419	0.61	2	8	0.261	1	14
51	Haptoglobin-related protein	P00739	3250	1	0.023	0.05	1	5	0.0977	1	8
52	Antithrombin-III	P01008	462	21	0.455	1	40	23	0.541	1	40
53	Plasminogen	P00747	5340	20	0.301	1	37	12	0.186	1	22
54	Plasminogen-like protein B	Q02325	5343	1	0.115	0.01	1	0	0	0	0
55	Apolipoprotein M	O95445	55937	1	0.149	1	1	2	0.218	1	2
56	Ceruloplasmin	P00450	1356	37	0.474	1	78	41	0.489	1	79
57	N-acetylmuramoyl-L-alanine amidase	Q96PD5	114770	10	0.314	1	18	9	0.335	1	12
58	Complement C1q subcomponent subunit A	P02745	712	3	0.135	1	4	2	0.131	1	5
59	Carbonic anhydrase 1	P00915	759	9	0.54	1	17	11	0.575	1	17
60	Complement factor I	P05156	3426	7	0.142	1	8	5	0.12	1	5
61	Inter-alpha-trypsin inhibitor heavy chain H4	Q14624	3700	26	0.185	1	51	32	0.448	1	62
62	Apolipoprotein E	P02649	348	20	0.615	1	58	17	0.568	1	30
63	Complement component C6	P13671	729	13	0.196	1	18	9	0.148	1	11
64	Apolipoprotein a	P08519	4018	1	0.0093	1	3	3	0.0206	1	5
65	Platelet basic protein	P02775	5473	4	0.375	1	6	3	0.266	1	4
66	Proteoglycan 4	Q92954	10216	4	0.0381	1	5	4	0.0381	1	5
67	Apolipoprotein L1	O14791	8542	8	0.296	1	12	13	0.43	1	16
68	Apolipoprotein C-II	P02655	344	4	0.436	1	4	6	0.624	1	7
69	Complement factor D	P00746	1675	3	0.241	1	4	3	0.249	1	5
70	Vitronectin	P04004	7448	10	0.203	1	20	10	0.153	1	15
71	Prothrombin	P00734	2147	18	0.286	1	30	8	0.124	1	13
72	Plasma kallikrein	P03952	3818	11	0.196	1	16	2	0.0408	1	2
73	Dermcidin	P81605	117159	0	0	0	0	1	0.1	0.99	1
74	Plasma protease C1 inhibitor	P05155	710	13	0.272	1	32	13	0.258	1	21
75	POTE ankyrin domain family member E	Q6S8J3	445582	3	0.0353	0.13	3	2	0.0251	0.38	2
76	Actin, cytoplasmic 2	P63261	71	0	0	0	0	0	0	0	0
77	POTE ankyrin domain family member F	A5A3E0	728378	3	0.0353	0.1	3	2	0.0251	0.24	2
78	POTE ankyrin domain family member I	P0CG38	653269	2	0.0205	0.11	2	1	0.0102	0.29	1
79	POTE ankyrin domain family member J	P0CG39	653781	0	0	0	0	0	0	0	0
80	Actin, aortic smooth muscle	P62736	59	0	0	0	0	0	0	0	0
81	Beta-2-microglobulin	P61769	567	2	0.168	1	4	4	0.429	1	5
82	Protein AMBP	P02760	259	8	0.23	1	12	7	0.264	1	15
83	Tetranectin	P05452	7123	0	0	0	0	0	0	0	0
84	Apolipoprotein C-III	P02656	345	4	0.485	1	7	5	0.626	1	9
85	Complement component C8 gamma chain	P07360	733	0	0	0	0	2	0.129	1	2
86	Hornerin	Q86YZ3	388697	2	0.0126	1	4	1	0.0056	0.99	1
87	Alpha-2-antiplasmin	P08697	5345	11	0.344	1	15	12	0.424	1	15
88	Complement C1s subcomponent	P09871	716	7	0.142	1	8	5	0.093	1	6
89	Mannan-binding lectin serine protease 1	P48740	5648	0	0	0	0	0	0	0	0
90	Alpha-1-antitrypsin	P01009	5265	0	0	0	0	0	0	0	0
91	Insulin-like growth factor-binding protein 3	P17936	3486	2	0.0505	1	2	2	0.108	1	3
92	Ryanodine receptor 2	Q92736	6262	0	0	0	0	1	0.0016	0.94	1
93	Clusterin	P10909	1191	15	0.336	1	23	17	0.408	1	24
94	Complement C2	P06681	717	1	0.0149	0.82	2	0	0	0	0
95	Cystatin-C	P01034	1471	2	0.185	1	3	3	0.192	1	3
96	Complement component C7	P10643	730	0	0	0	0	1	0.019	0.99	1
97	Complement C1r subcomponent	P00736	715	4	0	1	5	1	0	0.21	2
98	Apolipoprotein C-IV	P55056	346	3	0.181	1	5	4	0.283	1	6
99	Inter-alpha-trypsin inhibitor heavy chain H3	Q06033	3699	4	0.0775	1	6	7	0.109	1	9
100	Zinc-alpha-2-glycoprotein	P25311	563	12	0.419	1	18	14	0.446	1	20
101	Carboxypeptidase N catalytic chain	P15169	1369	4	0.144	1	4	1	0.0328	0.99	1
102	Platelet factor 4	P02776	5196	2	0.257	1	3	1	0.149	1	1
103	Afamin	P43652	173	9	0.197	1	14	5	0.0918	1	6
104	Pigment epithelium-derived factor	P36955	5176	10	0.289	1	18	8	0.278	1	10
105	Lysozyme C	P61626	4069	1	0.0811	1	1	1	0.0811	0.99	1
106	Insulin-like growth factor-binding protein complex acid labile subunit	P35858	3483	6	0.145	1	7	2	0.0684	1	3
107	Coagulation factor IX	P00740	2158	6	0.128	1	8	1	0.0195	0.99	1
108	Corticosteroid-binding globulin	P08185	866	3	0.141	1	4	3	0.116	1	3
109	Serum albumin	P02768	213	0	0	0	0	0	0	0	0
110	Phosphatidylinositol-glycan-specific phospholipase D	P80108	2822	5	0.0786	1	5	2	0.0357	1	2
111	C-reactive protein	P02741	1401	1	0.0446	1	1	6	0.219	1	7
112	Vitamin K-dependent protein C	P04070	5624	3	0.124	1	4	2	0.0282	1	3
113	Heparin cofactor 2	P05546	3053	11	0.297	1	13	7	0.108	1	7
114	Lumican	P51884	4060	7	0.183	1	7	8	0.21	1	8
115	Complement component C8 alpha chain	P07357	731	3	0.0873	1	3	1	0.0291	0.96	1
116	Collagen alpha-2(V) chain	P05997	1290	0	0	0	0	0	0	0	0
117	Myb-related protein A	P10243	4603	0	0	0	0	1	0.0106	0.96	1
118	Carboxypeptidase N subunit 2	P22792	1370	4	0.112	0.96	5	2	0.0679	0.74	2
119	Sex hormone-binding globulin	P04278	6462	3	0.127	1	4	3	0.149	1	3
120	Carbonic anhydrase 2	P00918	760	4	0.215	1	4	4	0.192	1	5
121	Collagen alpha-2(IV) chain	P08572	1284	0	0	0	0	2	0.0228	1	2
122	Protein S100-A8	P05109	6279	1	9.4	1	1	2	0.188	1	2
123	Complement component C9	P02748	735	4	0.0859	1	5	7	0.157	1	8
124	LON peptidase N-terminal domain and RING finger protein 3	Q496Y0	79836	2	0.0277	1	2	0	0	0	0
125	Protein Z-dependent protease inhibitor	Q9UK55	51156	2	0.0676	1	2	2	0.0901	1	2
126	Alpha-1-acid glycoprotein 1	P02763	5004	10	0.413	1	62	12	0.433	1	75
127	L-lactate dehydrogenase A chain	P00338	3939	0	0	0	0	0	0	0	0
128	L-lactate dehydrogenase B chain	P07195	3945	2	0.0749	1	2	0	0	0	0
129	L-lactate dehydrogenase C chain	P07864	3948	0	0	0	0	0	0	0	0
130	Apolipoprotein F	Q13790	319	2	0.0767	1	2	3	0.117	1	3
131	Prostaglandin-H2 D-isomerase	P41222	5730	3	0.258	1	3	2	0.168	1	2
132	eIF-2-alpha kinase activator GCN1	Q92616	10985	0	0	0	0	0	0	0	0
133	Plasma serine protease	P05154	5104	1	0.0296	0.99	1	2	0.0591	1	2
134	Apolipoprotein D	P05090	347	5	0.307	1	14	7	0.312	1	15
135	Complement component C8 beta chain	P07358	732	2	0.0508	0.59	2	0	0	0	0
136	Kallistatin	P29622	5267	5	0.129	1	5	5	0.131	1	5
137	Lipopolysaccharide-binding protein	P18428	3929	2	0.0769	1	2	1	0.0478	1	1
138	Extracellular matrix protein 1	Q16610	1893	1	0.0176	0.18	1	0	0	0	0
139	Adiponectin	Q15848	9370	2	0.123	1	2	2	0.123	1	2
140	nudC domain-containing protein 2	Q8WVJ2	134492	0	0	0	0	0	0	0	0
141	Leucine-rich alpha-2-glycoprotein	P02750	116844	4	0.17	0.99	6	6	0.28	1	12
142	Coagulation factor XII	P00748	2161	5	0.156	1	8	1	0.0293	0.35	1
143	Attractin	O75882	8455	3	0.0303	1	3	2	0.0194	1	2
144	Cysteine-rich secretory protein 3	P54108	10321	2	0.0933	1	2	3	0.123	1	3
145	CD5 antigen-like isoform 2	O43866	922	0	0	0	0	0	0	0	0
146	Fibulin-1	P23142	2192	0	0	0	0	0	0	0	0
147	Intraflagellar transport protein 74 homolog	Q96LB3	80173	2	0.0717	1	2	0	0	0	0
148	Cystatin-A	P01040	1475	1	0.122	0.68	1	3	0.337	1	3
149	Spectrin beta chain, non-erythrocytic 4 isoform sigma1	Q9H254	57731	0	0	0	0	0	0	0	0
150	Complement factor H-related protein 3	Q02985	10878	2	0.0967	1	5	2	0.0967	1	4
151	Glutathione peroxidase 3	P22352	2878	0	0	0	0	0	0	0	0
152	Thyroxine-binding globulin	P05543	6906	5	0.149	1	5	0	0	0	0
153	Tyrosine-protein kinase PRAG1	Q86YV5	157285	0	0	0	0	0	0	0	0
154	14-3-3 protein zeta/delta	P63104	7534	2	0.106	1	2	3	0.18	1	3
155	Immunoglobulin lambda-like polypeptide 5	B9A064	100423062	0	0	0	0	0	0	0	0
156	Hepatocyte growth factor activator	Q04756	3083	2	0.0473	1	2	0	0	0	0
157	Histone-lysine N-methyltransferase 2A	Q03164	4297	0	0	0	0	0	0	0	0
158	Serum paraoxonase/lactonase 3	Q15166	5446	3	0.0904	1	5	1	0.0254	0.31	5
159	Complement C1r subcomponent-like protein	Q9NZP8	51279	1	0.0246	0.51	2	1	0.0246	0.13	2
160	Neutrophil defensin 1	P59665	1667	0	0	0	0	1	0.0957	0.76	1
161	Neutrophil defensin 3	P59666	1668	0	0	0	0	1	0.0957	0.07	1
162	Hepatocyte growth factor-like protein	P26927	4485	2	0.0414	1	3	0	0	0	0
163	Out at first protein homolog	Q86UD1	220323	0	0	0	0	2	0.0879	1	2
164	Mannose-binding protein C	P11226	4153	1	0.0524	0.02	1	0	0	0	0
165	Hyaluronan-binding protein 2	Q14520	3026	0	0	0	0	0	0	0	0
166	Carboxypeptidase N catalytic chain	P15169	1369	0	0	0	0	0	0	0	0
167	Biotinidase	P43251	686	0	0	0	0	0	0	0	0

## Sheet: Run2(b)
	This MS Excel File contains the report of LC-MS/MS Data Analysis done using Scaffold Software.
	The Sheet 4 named as "Run2(b)" provides the report obtained from the second part of the second LC-MS/MS run.
	This Sheet contains information on identified proteins, their UniProt ID, Gene ID, Unique peptide Count, Percent Coverage, Protein Identification Probability, Total Spectral Count for Healthy Sample (3H) and for Atopic asthma patient sample (3A).
				Healthy (3H)				Atopic Asthma Patient (3A)
Sl. No	Identified Proteins (167)	UniProt_ID	Gene_ID	Unique Peptide Count	Percent Coverage	Protein Identification Probability	Total Spectral Count	unique Peptide Count	Percent Coverage	Protein Identification Probability	Total Spectral Count
1	Fibrinogen alpha chain isoform alpha-E	P02671	2243	52	0.406	1	191	50	0.492	1	216
2	Apolipoprotein A-II	P02652	336	13	0.72	1	68	16	0.77	1	86
3	Complement C3	P01024	718	99	0.505	1	388	109	0.556	1	388
4	Apolipoprotein B	P04114	338	179	0.456	1	262	150	0.42	1	193
5	Alpha-2-macroglobulin isoform a	P01023	2	68	0.6	1	260	85	0.668	1	511
6	Pregnancy zone protein	P20742	5858	7	0.0621	0.31	38	8	0.0675	0.34	77
7	Apolipoprotein A-I	P02647	335	55	0.869	1	481	51	0.869	1	503
8	Alpha-1B-glycoprotein	P04217	1	13	0.39	1	27	15	0.493	1	27
9	Transthyretin	E9KL36	7276	23	0.694	1	123	25	0.694	1	128
10	Beta-2-glycoprotein 1	P02749	350	6	0.261	1	9	15	0.522	1	37
11	Neurofilament heavy polypeptide	P12036	4744	0	0	0.11	0	2	0.0088	0.3	3
12	Histidine-rich glycoprotein	P04196	3273	10	0.259	1	16	14	0.318	1	21
13	Complement C4-A	P0C0L4	720	68	0.372	1	192	62	0.301	1	104
14	Serotransferrin	P02787	7018	0	0	0	0	0	0	0	0
15	Serum amyloid P-component	P02743	325	4	0.161	1	4	0	0	0	0
16	SAA2-SAA2 protein	A0A096LPE2	100528017	4	0.207	1	7	5	0.255	1	10
17	Serum amyloid A-1 protein	P0DJI8	6288	0	0	0	0	1	0.131	0.99	1
18	Serum amyloid A-2 protein	P0DJI9	6289	0	0	0	0	0	0	0	0
19	Angiotensinogen	P01019	183	8	0.272	1	11	8	0.231	1	21
20	Alpha-1-acid glycoprotein 2	P19652	5005	7	0.383	1	25	8	0.403	1	13
21	Hemopexin	P02790	3263	28	0.511	1	57	31	0.654	1	95
22	Serum paraoxonase/arylesterase 1	P27169	5444	8	0.375	1	16	8	0.31	1	16
23	Fibrinogen beta chain isoform 1	P02675	2244	30	0.54	1	85	38	0.737	1	173
24	Complement factor H	P08603	3075	24	0.167	1	29	43	0.474	1	63
25	Titin isoform IC	A0A0A0MTS7	7273	5	0.0011	1	6	4	0.002	1	4
26	Retinol-binding protein 4	P02753	5950	10	0.682	1	32	0	0	0	0
27	Hemoglobin subunit beta	P68871	3043	15	0.837	1	82	6	0.435	1	7
28	Hemoglobin subunit delta	P02042	3045	12	0.667	1	40	3	0.204	0.34	3
29	Hemoglobin subunit gamma-2	P69892	3048	1	0.068	0.06	9	1	0.068	0.08	1
30	Vitamin D-binding protein	P02774	2638	11	0.223	1	37	21	0.45	1	60
31	Complement C5	P01031	727	21	0.119	1	23	19	0.156	1	25
32	Hemoglobin subunit alpha	P69905	3039	9	0.648	1	36	1	0.106	1	1
33	Complement C1q subcomponent subunit B	P02746	713	0	0	0	0	2	0.115	1	2
34	Fibronectin isoform 3	P02751	2335	6	0.0395	1	7	33	0.221	1	35
35	Complement C1q subcomponent subunit C	P02747	714	6	0.261	1	10	5	0.253	1	10
36	Apolipoprotein C-I	P02654	341	10	0.422	1	12	10	0.53	1	19
37	Mucin-19	Q7Z5P9	283463	0	0	0	0	0	0	0	0
38	Kininogen-1	P01042	3827	16	0.368	1	22	16	0.431	1	34
39	Inter-alpha-trypsin inhibitor heavy chain H1	P19827	3697	15	0.209	1	24	16	0.229	1	32
40	Complement factor H-related protein 2	P36980	3080	5	0.233	1	7	2	0.0407	0.28	3
41	Complement factor H-related protein 1	Q03591	3078	10	0.352	1	13	7	0.164	1	9
42	Alpha-1-antichymotrypsin	P01011	12	18	0.414	1	42	17	0.489	1	38
43	Apolipoprotein A-IV	P06727	337	39	0.778	1	105	28	0.598	1	65
44	Inter-alpha-trypsin inhibitor heavy chain H2	P19823	3698	23	0.357	1	43	24	0.353	1	57
45	Gelsolin	P06396	2934	19	0.34	1	26	18	0.338	1	30
46	Fibrinogen gamma chain	P02679	2266	25	0.561	1	85	29	0.689	1	196
47	Ficolin-3	O75636	8547	8	0.298	1	9	1	0.0334	1	1
48	Alpha-2-HS-glycoprotein	P02765	197	9	0.253	1	19	13	0.417	1	56
49	Complement factor B	P00751	629	21	0.271	1	28	18	0.288	1	27
50	Haptoglobin	P00738	3240	0	0	0	0	0	0	0	0
51	Haptoglobin-related protein	P00739	3250	0	0	0	0	0	0	0	0
52	Antithrombin-III	P01008	462	23	0.496	1	35	22	0.438	1	53
53	Plasminogen	P00747	5340	12	0.204	1	14	22	0.351	1	34
54	Plasminogen-like protein B	Q02325	5343	0	0	0	0	1	0.0729	0.18	1
55	Apolipoprotein M	O95445	55937	1	0.0745	1	2	2	0.223	1	2
56	Ceruloplasmin	P00450	1356	37	0.433	1	67	44	0.474	1	100
57	N-acetylmuramoyl-L-alanine amidase	Q96PD5	114770	7	0.22	1	8	9	0.326	1	13
58	Complement C1q subcomponent subunit A	P02745	712	0	0	0	0	0	0	0	0
59	Carbonic anhydrase 1	P00915	759	0	0	0	0	0	0	0	0
60	Complement factor I	P05156	3426	6	0.0772	1	8	5	0.101	1	7
61	Inter-alpha-trypsin inhibitor heavy chain H4	Q14624	3700	30	0.426	1	56	28	0.326	1	47
62	Apolipoprotein E	P02649	348	19	0.615	1	31	19	0.536	1	32
63	Complement component C6	P13671	729	6	0.0782	1	8	7	0.102	1	10
64	Apolipoprotein a	P08519	4018	1	0.0093	1	1	3	0.0142	1	3
65	Platelet basic protein	P02775	5473	0	0	0	0	4	0.375	1	8
66	Proteoglycan 4	Q92954	10216	2	0.0175	1	2	2	0.0175	1	3
67	Apolipoprotein L1	O14791	8542	7	0.307	1	9	2	0.093	0.99	2
68	Apolipoprotein C-II	P02655	344	5	0.455	1	7	4	0.436	1	7
69	Complement factor D	P00746	1675	5	0.372	1	6	4	0.344	1	5
70	Vitronectin	P04004	7448	6	0.13	1	9	8	0.14	1	11
71	Prothrombin	P00734	2147	13	0.166	1	9	15	0.272	1	18
72	Plasma kallikrein	P03952	3818	4	0.0408	1	4	3	0.0502	1	3
73	Dermcidin	P81605	117159	2	0.1	1	2	2	0.2	1	2
74	Plasma protease C1 inhibitor	P05155	710	13	0.252	1	25	14	0.292	1	22
75	POTE ankyrin domain family member E	Q6S8J3	445582	0	0	0	0	0	0	0	0
76	Actin, cytoplasmic 2	P63261	71	0	0	0	0	0	0	0	0
77	POTE ankyrin domain family member F	A5A3E0	728378	0	0	0	0	0	0	0	0
78	POTE ankyrin domain family member I	P0CG38	653269	0	0	0	0	0	0	0	0
79	POTE ankyrin domain family member J	P0CG39	653781	0	0	0	0	0	0	0	0
80	Actin, aortic smooth muscle	P62736	59	0	0	0	0	0	0	0	0
81	Beta-2-microglobulin	P61769	567	2	0.269	1	2	3	0.353	1	3
82	Protein AMBP	P02760	259	7	0.23	1	8	5	0.119	1	9
83	Tetranectin	P05452	7123	7	0.425	1	8	0	0	0	0
84	Apolipoprotein C-III	P02656	345	1	0.111	1	1	1	0.111	1	1
85	Complement component C8 gamma chain	P07360	733	9	0.55	1	13	0	0	0	0
86	Hornerin	Q86YZ3	388697	2	0.0126	1	2	2	0.0126	1	4
87	Alpha-2-antiplasmin	P08697	5345	9	0.281	1	12	11	0.291	1	13
88	Complement C1s subcomponent	P09871	716	5	0.0916	1	7	7	0.104	0.97	12
89	Mannan-binding lectin serine protease 1	P48740	5648	1	0.0211	0.02	1	0	0	0	0
90	Alpha-1-antitrypsin	P01009	5265	0	0	0	0	0	0	0	0
91	Insulin-like growth factor-binding protein 3	P17936	3486	3	0.114	1	4	1	0.0505	0.99	2
92	Ryanodine receptor 2	Q92736	6262	2	0.0048	1	2	0	0	0	0
93	Clusterin	P10909	1191	14	0.325	1	27	7	0.183	1	10
94	Complement C2	P06681	717	3	0.0439	0.99	3	1	0.0502	1	2
95	Cystatin-C	P01034	1471	1	0.0753	1	1	3	0.192	1	4
96	Complement component C7	P10643	730	3	0.0546	1	3	6	0.125	1	8
97	Complement C1r subcomponent	P00736	715	2	0	0.97	2	5	0	1	6
98	Apolipoprotein C-IV	P55056	346	0	0	0	0	0	0	0	0
99	Inter-alpha-trypsin inhibitor heavy chain H3	Q06033	3699	4	0.0697	1	6	7	0.121	1	10
100	Zinc-alpha-2-glycoprotein	P25311	563	14	0.527	1	27	10	0.302	1	18
101	Carboxypeptidase N catalytic chain	P15169	1369	2	0.0699	1	2	1	0.0415	0.76	2
102	Platelet factor 4	P02776	5196	0	0	0	0	2	0.356	1	5
103	Afamin	P43652	173	6	0.152	1	7	13	0.257	1	14
104	Pigment epithelium-derived factor	P36955	5176	7	0.273	1	8	8	0.282	1	13
105	Lysozyme C	P61626	4069	1	0.0811	1	1	4	0.405	1	4
106	Insulin-like growth factor-binding protein complex acid labile subunit	P35858	3483	4	0.0918	1	5	4	0.0787	1	4
107	Coagulation factor IX	P00740	2158	2	0.0521	1	2	1	0.0195	0.99	1
108	Corticosteroid-binding globulin	P08185	866	1	0.0444	1	1	1	0.0444	0.99	1
109	Serum albumin	P02768	213	0	0	0	0	0	0	0	0
110	Phosphatidylinositol-glycan-specific phospholipase D	P80108	2822	1	0.0155	0.97	1	1	0.0179	0.99	1
111	C-reactive protein	P02741	1401	0	0	0	0	0	0	0	0
112	Vitamin K-dependent protein C	P04070	5624	1	0.026	1	1	1	0.026	1	1
113	Heparin cofactor 2	P05546	3053	3	0.0581	0.98	4	8	0.198	1	9
114	Lumican	P51884	4060	3	0.109	0.98	4	7	0.231	1	11
115	Complement component C8 alpha chain	P07357	731	1	0.0291	0.87	1	5	0.106	1	6
116	Collagen alpha-2(V) chain	P05997	1290	0	0	0	0	1	0.008	1	1
117	Myb-related protein A	P10243	4603	2	0.0346	1	2	2	0.0346	1	2
118	Carboxypeptidase N subunit 2	P22792	1370	2	0.0789	0.75	3	5	0.158	1	5
119	Sex hormone-binding globulin	P04278	6462	2	0.0945	1	2	4	0.157	1	5
120	Carbonic anhydrase 2	P00918	760	0	0	0	0	0	0	0	0
121	Collagen alpha-2(IV) chain	P08572	1284	0	0	0	0	0	0	0	0
122	Protein S100-A8	P05109	6279	1	0.094	1	1	1	0.094	1	1
123	Complement component C9	P02748	735	7	0.152	1	9	10	0.234	1	13
124	LON peptidase N-terminal domain and RING finger protein 3	Q496Y0	79836	1	0.0105	0.61	2	1	0.0105	0.51	1
125	Protein Z-dependent protease inhibitor	Q9UK55	51156	1	0.036	0.99	1	1	0.036	0.99	1
126	Alpha-1-acid glycoprotein 1	P02763	5004	13	0.468	1	67	8	0.413	1	18
127	L-lactate dehydrogenase A chain	P00338	3939	1	0.0332	0.94	1	0	0	0	0
128	L-lactate dehydrogenase B chain	P07195	3945	1	0.0359	0.35	1	0	0	0	0
129	L-lactate dehydrogenase C chain	P07864	3948	1	0.0361	0.05	1	0	0	0	0
130	Apolipoprotein F	Q13790	319	0	0	0	0	1	0.0429	0.99	1
131	Prostaglandin-H2 D-isomerase	P41222	5730	0	0	0	0	2	0.168	1	2
132	eIF-2-alpha kinase activator GCN1	Q92616	10985	0	0	0	0	0	0	0	0
133	Plasma serine protease	P05154	5104	2	0.0567	1	2	1	0.0271	1	1
134	Apolipoprotein D	P05090	347	5	0.265	1	7	2	0.127	0.97	2
135	Complement component C8 beta chain	P07358	732	5	0.107	1	6	2	0.0508	0.82	2
136	Kallistatin	P29622	5267	3	0.069	1	3	2	0.0668	1	2
137	Lipopolysaccharide-binding protein	P18428	3929	0	0	0	0	1	0.0395	0.99	1
138	Extracellular matrix protein 1	Q16610	1893	0	0	0	0	1	0.0229	0.81	1
139	Adiponectin	Q15848	9370	0	0	0	0	0	0	0	0
140	nudC domain-containing protein 2	Q8WVJ2	134492	0	0	0	0	0	0	0	0
141	Leucine-rich alpha-2-glycoprotein	P02750	116844	2	0.104	0.94	2	5	0.245	1	10
142	Coagulation factor XII	P00748	2161	2	0.0585	0.83	2	7	0.161	1	7
143	Attractin	O75882	8455	0	0	0	0	1	0.0124	0.8	1
144	Cysteine-rich secretory protein 3	P54108	10321	0	0	0	0	1	0.0336	0.99	1
145	CD5 antigen-like isoform 2	O43866	922	4	0.176	1	4	1	0.0403	1	1
146	Fibulin-1	P23142	2192	0	0	0	0	0	0	0	0
147	Intraflagellar transport protein 74 homolog	Q96LB3	80173	0	0	0	0	0	0	0	0
148	Cystatin-A	P01040	1475	0	0	0	0	3	0.52	1	3
149	Spectrin beta chain, non-erythrocytic 4 isoform sigma1	Q9H254	57731	0	0	0	0	0	0	0	0
150	Complement factor H-related protein 3	Q02985	10878	0	0	0	0	1	0.0372	0.04	2
151	Glutathione peroxidase 3	P22352	2878	2	0.115	0.99	2	0	0	0	0
152	Thyroxine-binding globulin	P05543	6906	3	0.0699	1	3	3	0.106	0.81	3
153	Tyrosine-protein kinase PRAG1	Q86YV5	157285	0	0	0	0	0	0	0	0
154	14-3-3 protein zeta/delta	P63104	7534	0	0	0	0	0	0	0	0
155	Immunoglobulin lambda-like polypeptide 5	B9A064	100423062	0	0	0	0	0	0	0	0
156	Hepatocyte growth factor activator	Q04756	3083	0	0	0	0	0	0	0	0
157	Histone-lysine N-methyltransferase 2A	Q03164	4297	0	0	0	0	0	0	0	0
158	Serum paraoxonase/lactonase 3	Q15166	5446	2	0.0706	1	5	1	0.0254	0.05	2
159	Complement C1r subcomponent-like protein	Q9NZP8	51279	1	0.0287	0.52	1	4	0.103	0.94	4
160	Neutrophil defensin 1	P59665	1667	1	0.0957	0.42	1	2	0.191	0.93	2
161	Neutrophil defensin 3	P59666	1668	1	0.0957	0.05	1	2	0.191	0.14	2
162	Hepatocyte growth factor-like protein	P26927	4485	0	0	0	0	0	0	0	0
163	Out at first protein homolog	Q86UD1	220323	0	0	0	0	0	0	0	0
164	Mannose-binding protein C	P11226	4153	0	0	0	0	0	0	0	0
165	Hyaluronan-binding protein 2	Q14520	3026	0	0	0	0	2	0.0543	1	2
166	Carboxypeptidase N catalytic chain	P15169	1369	0	0	0	0	0	0	0	0
167	Biotinidase	P43251	686	1	0.0239	0.01	1	1	0.0239	0.01	1

## Sheet: Run3
	This MS Excel File contains the report of LC-MS/MS Data Analysis done using Scaffold Software.
	The Sheet 5 named as "Run3" provides the report obtained from the third LC-MS/MS run.
	This Sheet contains information on identified proteins, their UniProt ID, Gene ID, Unique peptide Count, Percent Coverage, Protein Identification Probability, Total Spectral Count for Healthy Samples (4H and 5H) and for Atopic asthma patient samples (4A and 5A).
				Healthy (4H)				Healthy (5H)				Atopic Asthma Patient (4A)				Atopic Asthma Patient (5A)
Sl. No	Identified Proteins (167)	UniProt_ID	Gene_ID	Unique Peptide Count	Percent Coverage	Protein Identification Probability	Total Spectral Count	Unique Peptide Count	Percent Coverage	Protein Identification Probability	Total Spectral Count	Unique Peptide Count	Percent Coverage	Protein Identification Probability	Total Spectral Count	Unique Peptide Count	Percent Coverage	Protein Identification Probability	Total Spectral Count
1	Fibrinogen alpha chain isoform alpha-E	P02671	2243	42	0.436	1	184	47	0.471	1	186	49	0.518	1	183	50	0.467	1	212
2	Apolipoprotein A-II	P02652	336	6	0.47	1	9	5	0.47	1	8	3	0.22	1	5	5	0.47	1	8
3	Complement C3	P01024	718	99	0.43	1	349	94	0.417	1	289	102	0.428	1	342	90	0.525	1	256
4	Apolipoprotein B	P04114	338	91	0.253	1	103	70	0.207	1	80	81	0.219	1	93	90	0.274	1	101
5	Alpha-2-macroglobulin isoform a	P01023	2	72	0.586	1	286	74	0.605	1	241	78	0.56	1	328	66	0.569	1	211
6	Pregnancy zone protein	P20742	5858	9	0.0668	0.34	40	8	0.0621	0.33	32	8	0.0614	0.31	47	8	0.0823	1	24
7	Apolipoprotein A-I	P02647	335	40	0.854	1	249	42	0.861	1	159	34	0.846	1	140	45	0.876	1	256
8	Alpha-1B-glycoprotein	P04217	1	12	0.386	1	16	12	0.392	1	14	14	0.424	1	21	15	0.521	1	22
9	Transthyretin	E9KL36	7276	18	0.605	1	81	20	0.694	1	106	12	0.605	1	22	17	0.694	1	80
10	Beta-2-glycoprotein 1	P02749	350	13	0.467	1	26	14	0.499	1	18	11	0.42	1	21	12	0.464	1	21
11	Neurofilament heavy polypeptide	P12036	4744	0	0	0.03	0	0	0	0	0	1	0.0078	0	1	2	0.0088	0.01	2
12	Histidine-rich glycoprotein	P04196	3273	8	0.204	1	11	8	0.204	1	12	10	0.23	1	15	11	0.204	1	18
13	Complement C4-A	P0C0L4	720	51	0.179	1	92	50	0.158	1	82	61	0.279	1	119	58	0.227	1	131
14	Serotransferrin	P02787	7018	0	0	0	0	0	0	0	0	0	0	0	0	0	0	0	0
15	Serum amyloid P-component	P02743	325	9	0.309	1	10	7	0.3	1	14	9	0.309	1	9	8	0.309	1	16
16	SAA2-SAA2 protein	A0A096LPE2	100528017	5	0.216	1	7	5	0.216	1	9	5	0.216	1	8	6	0.322	1	9
17	Serum amyloid A-1 protein	P0DJI8	6288	0	0	0	0	0	0	0	0	2	0.303	1	2	2	0.279	1	2
18	Serum amyloid A-2 protein	P0DJI9	6289	0	0	0	0	0	0	0	0	0	0	0	0	1	0.115	0.05	1
19	Angiotensinogen	P01019	183	9	0.233	1	15	10	0.233	1	13	8	0.219	1	12	9	0.233	1	12
20	Alpha-1-acid glycoprotein 2	P19652	5005	5	0.244	1	21	5	0.279	1	18	4	0.219	1	13	3	0.179	1	9
21	Hemopexin	P02790	3263	21	0.535	1	50	23	0.502	1	48	20	0.483	1	60	18	0.478	1	55
22	Serum paraoxonase/arylesterase 1	P27169	5444	10	0.372	1	13	7	0.27	1	9	6	0.203	1	6	3	0.104	1	3
23	Fibrinogen beta chain isoform 1	P02675	2244	32	0.587	1	91	31	0.515	1	93	27	0.481	1	83	33	0.521	1	108
24	Complement factor H	P08603	3075	34	0.337	1	42	35	0.355	1	46	36	0.363	1	47	28	0.301	1	37
25	Titin isoform IC	A0A0A0MTS7	7273	0	0	0	0	6	0.0013	1	6	0	0	0	0	0	0	0	0
26	Retinol-binding protein 4	P02753	5950	5	0.244	1	14	7	0.393	1	11	4	0.244	1	6	9	0.413	1	14
27	Hemoglobin subunit beta	P68871	3043	2	0.156	1	2	1	0.0884	0.99	1	3	0.218	1	3	9	0.687	1	10
28	Hemoglobin subunit delta	P02042	3045	1	0.068	0.02	1	0	0	0	0	1	0.068	0.07	1	5	0.327	0.5	6
29	Hemoglobin subunit gamma-2	P69892	3048	1	0.068	0.01	1	0	0	0	0	1	0.068	0.01	1	1	0.068	0.55	1
30	Vitamin D-binding protein	P02774	2638	16	0.379	1	40	16	0.424	1	37	20	0.448	1	39	17	0.394	1	35
31	Complement C5	P01031	727	15	0.0838	1	17	12	0.0643	1	13	14	0.0787	1	15	22	0.124	1	23
32	Hemoglobin subunit alpha	P69905	3039	0	0	0	0	0	0	0	0	2	0.31	1	3	3	0.296	1	5
33	Complement C1q subcomponent subunit B	P02746	713	6	0.308	1	8	5	0.229	1	7	5	0.221	1	5	6	0.202	1	9
34	Fibronectin isoform 3	P02751	2335	24	0.158	1	24	21	0.135	1	21	28	0.183	1	33	34	0.232	1	40
35	Complement C1q subcomponent subunit C	P02747	714	4	0.212	1	8	5	0.22	1	8	6	0.261	1	8	5	0.22	1	7
36	Apolipoprotein C-I	P02654	341	1	0.133	0.98	2	2	0.361	1	2	1	0.133	0.9	1	1	0.133	0.99	1
37	Mucin-19	Q7Z5P9	283463	0	0	0	0	0	0	0	0	0	0	0	0	0	0	0	0
38	Kininogen-1	P01042	3827	12	0.356	1	17	14	0.396	1	23	11	0.337	1	14	8	0.262	1	12
39	Inter-alpha-trypsin inhibitor heavy chain H1	P19827	3697	11	0.148	1	13	12	0.179	1	15	9	0.112	1	11	10	0.126	1	13
40	Complement factor H-related protein 2	P36980	3080	6	0.396	1	9	3	0.185	0.76	4	4	0.185	1	5	2	0.0852	1	2
41	Complement factor H-related protein 1	Q03591	3078	9	0.427	1	11	7	0.291	1	8	6	0.206	1	8	1	0.0273	0.01	2
42	Alpha-1-antichymotrypsin	P01011	12	14	0.34	1	39	14	0.345	1	29	16	0.324	1	37	14	0.326	1	37
43	Apolipoprotein A-IV	P06727	337	33	0.649	1	54	20	0.53	1	27	26	0.636	1	36	14	0.424	1	15
44	Inter-alpha-trypsin inhibitor heavy chain H2	P19823	3698	20	0.263	1	29	17	0.249	1	27	16	0.235	1	23	22	0.32	1	24
45	Gelsolin	P06396	2934	18	0.335	1	23	12	0.223	1	14	12	0.199	1	12	13	0.228	1	15
46	Fibrinogen gamma chain	P02679	2266	23	0.593	1	104	21	0.563	1	87	20	0.563	1	95	24	0.622	1	111
47	Ficolin-3	O75636	8547	2	0.0803	1	3	3	0.11	1	5	3	0.151	1	3	4	0.181	1	5
48	Alpha-2-HS-glycoprotein	P02765	197	9	0.351	1	19	10	0.332	1	27	11	0.351	1	30	9	0.351	1	19
49	Complement factor B	P00751	629	23	0.342	1	32	24	0.349	1	33	23	0.356	1	33	24	0.387	1	33
50	Haptoglobin	P00738	3240	0	0	0	0	0	0	0	0	2	0.0369	0.05	2	6	0.192	1	15
51	Haptoglobin-related protein	P00739	3250	0	0	0	0	0	0	0	0	1	0.0431	0.01	1	3	0.092	0.35	7
52	Antithrombin-III	P01008	462	14	0.321	1	30	14	0.297	1	26	11	0.231	1	20	12	0.315	1	22
53	Plasminogen	P00747	5340	18	0.325	1	23	16	0.285	1	20	20	0.38	1	23	19	0.364	1	22
54	Plasminogen-like protein B	Q02325	5343	1	0.115	0	1	0	0	0	0	0	0	0	0	0	0	0	0
55	Apolipoprotein M	O95445	55937	4	0.16	1	7	3	0.122	1	4	1	0.0479	0.99	1	4	0.16	1	7
56	Ceruloplasmin	P00450	1356	34	0.387	1	57	34	0.375	1	59	36	0.382	1	68	37	0.423	1	63
57	N-acetylmuramoyl-L-alanine amidase	Q96PD5	114770	7	0.247	1	7	4	0.144	1	4	7	0.184	1	7	5	0.158	1	5
58	Complement C1q subcomponent subunit A	P02745	712	4	0.2	1	5	2	0.135	1	2	4	0.18	1	5	4	0.139	1	7
59	Carbonic anhydrase 1	P00915	759	2	0.0728	1	2	0	0	0	0	1	0.0345	0.99	1	0	0	0	0
60	Complement factor I	P05156	3426	13	0.166	1	14	7	0.0909	1	7	8	0.122	1	8	3	0.0772	0.95	3
61	Inter-alpha-trypsin inhibitor heavy chain H4	Q14624	3700	19	0.262	1	35	18	0.232	1	32	26	0.315	1	44	20	0.298	1	30
62	Apolipoprotein E	P02649	348	14	0.495	1	28	12	0.442	1	20	13	0.489	1	21	16	0.599	1	26
63	Complement component C6	P13671	729	7	0.109	1	7	6	0.0889	1	6	4	0.0535	1	5	8	0.143	1	10
64	Apolipoprotein a	P08519	4018	2	0.0113	1	2	2	0.0176	1	2	1	0.0093	0.62	1	1	0.0093	0.64	1
65	Platelet basic protein	P02775	5473	2	0.195	1	3	2	0.195	1	3	2	0.195	1	3	3	0.266	1	4
66	Proteoglycan 4	Q92954	10216	1	0.0122	1	1	0	0	0	0	1	0.0122	0.98	1	1	0.0122	1	1
67	Apolipoprotein L1	O14791	8542	2	0.0754	0.99	2	2	0.0754	1	2	3	0.136	1	3	1	0.0377	0.72	1
68	Apolipoprotein C-II	P02655	344	0	0	0	0	0	0	0	0	0	0	0	0	0	0	0	0
69	Complement factor D	P00746	1675	2	0.19	1	2	1	0.0949	1	1	0	0	0	0	0	0	0	0
70	Vitronectin	P04004	7448	9	0.14	1	10	8	0.226	1	12	7	0.19	1	14	8	0.115	1	9
71	Prothrombin	P00734	2147	15	0.317	1	18	7	0.286	1	20	10	0.241	1	12	10	0.265	1	15
72	Plasma kallikrein	P03952	3818	2	0.0423	1	3	2	0.0345	1	2	2	0.0423	1	2	1	0.0204	0.95	1
73	Dermcidin	P81605	117159	3	0.355	1	5	2	0.255	1	4	4	0.355	1	6	3	0.255	1	6
74	Plasma protease C1 inhibitor	P05155	710	10	0.218	1	17	8	0.162	1	11	8	0.162	1	9	13	0.24	1	20
75	POTE ankyrin domain family member E	Q6S8J3	445582	0	0	0	0	0	0	0	0	2	0.0344	0.02	3	0	0	0	0
76	Actin, cytoplasmic 2	P63261	71	0	0	0	0	0	0	0	0	0	0	0	0	0	0	0	0
77	POTE ankyrin domain family member F	A5A3E0	728378	0	0	0	0	0	0	0	0	2	0.0344	0.01	3	0	0	0	0
78	POTE ankyrin domain family member I	P0CG38	653269	0	0	0	0	0	0	0	0	1	0.0195	0.01	2	0	0	0	0
79	POTE ankyrin domain family member J	P0CG39	653781	0	0	0	0	0	0	0	0	0	0	0	0	0	0	0	0
80	Actin, aortic smooth muscle	P62736	59	0	0	0	0	0	0	0	0	0	0	0	0	0	0	0	0
81	Beta-2-microglobulin	P61769	567	1	0.084	0.98	1	0	0	0	0	1	0.084	0.98	2	1	0.084	0.78	1
82	Protein AMBP	P02760	259	10	0.202	1	15	10	0.27	1	13	7	0.151	1	9	10	0.304	1	14
83	Tetranectin	P05452	7123	7	0.406	1	11	6	0.319	1	8	4	0.294	1	4	7	0.525	1	8
84	Apolipoprotein C-III	P02656	345	0	0	0	0	1	0.111	0.99	1	0	0	0	0	0	0	0	0
85	Complement component C8 gamma chain	P07360	733	8	0.495	1	10	5	0.282	1	9	8	0.495	1	14	8	0.495	1	11
86	Hornerin	Q86YZ3	388697	0	0	0	0	1	0.0056	1	1	2	0.0126	1	2	1	0.0056	0.95	1
87	Alpha-2-antiplasmin	P08697	5345	8	0.244	1	10	9	0.232	1	11	7	0.212	1	8	6	0.204	1	7
88	Complement C1s subcomponent	P09871	716	6	0.108	1	6	5	0.0843	1	5	6	0.108	1	6	5	0.0901	0.92	5
89	Mannan-binding lectin serine protease 1	P48740	5648	0	0	0	0	0	0	0	0	0	0	0	0	0	0	0	0
90	Alpha-1-antitrypsin	P01009	5265	0	0	0	0	0	0	0	0	0	0	0	0	0	0	0	0
91	Insulin-like growth factor-binding protein 3	P17936	3486	1	0.0269	0.8	1	1	0.0269	0.86	1	0	0	0	0	0	0	0	0
92	Ryanodine receptor 2	Q92736	6262	1	0.0032	0.93	2	0	0	0	0	0	0	0	0	0	0	0	0
93	Clusterin	P10909	1191	9	0.235	1	17	11	0.252	1	25	11	0.296	1	15	15	0.312	1	27
94	Complement C2	P06681	717	1	0.0186	0.95	1	0	0	0	0	2	0.0353	1	2	3	0.0911	1	3
95	Cystatin-C	P01034	1471	0	0	0	0	1	0.0753	0.99	1	2	0.192	1	2	1	0.0753	1	1
96	Complement component C7	P10643	730	1	0.013	0.16	2	3	0.0546	1	4	2	0.0356	1	2	2	0.0463	1	2
97	Complement C1r subcomponent	P00736	715	3	0	1	3	1	0	0.92	2	1	0	0.86	3	1	0	0.04	1
98	Apolipoprotein C-IV	P55056	346	0	0	0	0	0	0	0	0	0	0	0	0	0	0	0	0
99	Inter-alpha-trypsin inhibitor heavy chain H3	Q06033	3699	5	0.0831	1	5	3	0.0584	1	3	4	0.0685	0.99	4	5	0.0831	1	6
100	Zinc-alpha-2-glycoprotein	P25311	563	12	0.43	1	21	10	0.43	1	16	8	0.362	1	13	2	0.0872	0.79	2
101	Carboxypeptidase N catalytic chain	P15169	1369	0	0	0	0	0	0	0	0	1	0.0328	0.95	1	0	0	0	0
102	Platelet factor 4	P02776	5196	0	0	0	0	0	0	0	0	0	0	0	0	1	0.149	0.99	1
103	Afamin	P43652	173	7	0.15	1	9	7	0.149	1	13	9	0.177	1	11	6	0.134	1	9
104	Pigment epithelium-derived factor	P36955	5176	4	0.163	1	5	4	0.167	1	4	3	0.12	1	3	1	0.0287	0.24	1
105	Lysozyme C	P61626	4069	1	0.0811	0.98	1	1	0.0811	0.99	1	1	0.0811	0.98	1	2	0.331	1	3
106	Insulin-like growth factor-binding protein complex acid labile subunit	P35858	3483	1	0.0233	0.75	1	5	0.0933	1	5	0	0	0	0	0	0	0	0
107	Coagulation factor IX	P00740	2158	0	0	0	0	0	0	0	0	0	0	0	0	0	0	0	0
108	Corticosteroid-binding globulin	P08185	866	1	0.0395	0.17	1	2	0.084	1	2	1	0.0444	0.96	1	0	0	0	0
109	Serum albumin	P02768	213	4	0.0558	0.99	6	2	0.0443	0.97	3	3	0.064	1	9	2	0.0361	0.99	6
110	Phosphatidylinositol-glycan-specific phospholipase D	P80108	2822	0	0	0	0	1	0.0131	0.95	1	0	0	0	0	0	0	0	0
111	C-reactive protein	P02741	1401	0	0	0	0	0	0	0	0	0	0	0	0	0	0	0	0
112	Vitamin K-dependent protein C	P04070	5624	0	0	0	0	0	0	0	0	0	0	0	0	0	0	0	0
113	Heparin cofactor 2	P05546	3053	4	0.0882	1	4	6	0.138	1	6	9	0.18	1	9	7	0.152	1	8
114	Lumican	P51884	4060	1	0.0533	0.26	3	2	0.0858	0.92	4	1	0.0533	0.14	1	1	0.0533	0.13	2
115	Complement component C8 alpha chain	P07357	731	0	0	0	0	1	0.0171	0.17	1	2	0.0462	0.94	2	0	0	0	0
116	Collagen alpha-2(V) chain	P05997	1290	0	0	0	0	0	0	0	0	0	0	0	0	4	0.0794	1	4
117	Myb-related protein A	P10243	4603	0	0	0	0	0	0	0	0	0	0	0	0	0	0	0	0
118	Carboxypeptidase N subunit 2	P22792	1370	1	0.0495	0.4	1	2	0.0789	0.75	2	1	0.0495	0.06	1	1	0.0495	0.08	1
119	Sex hormone-binding globulin	P04278	6462	2	0.0945	1	2	0	0	0	0	3	0.124	1	3	0	0	0	0
120	Carbonic anhydrase 2	P00918	760	0	0	0	0	0	0	0	0	0	0	0	0	0	0	0	0
121	Collagen alpha-2(IV) chain	P08572	1284	0	0	0	0	0	0	0	0	0	0	0	0	0	0	0	0
122	Protein S100-A8	P05109	6279	2	0.205	1	2	0	0	0	0	1	0.094	0.98	1	1	0.094	0.99	1
123	Complement component C9	P02748	735	6	0.109	1	6	4	0.104	0.99	4	7	0.163	1	7	5	0.127	1	5
124	LON peptidase N-terminal domain and RING finger protein 3	Q496Y0	79836	0	0	0	0	0	0	0	0	0	0	0	0	0	0	0	0
125	Protein Z-dependent protease inhibitor	Q9UK55	51156	1	0.036	0.98	1	0	0	0	0	0	0	0	0	0	0	0	0
126	Alpha-1-acid glycoprotein 1	P02763	5004	6	0.279	1	34	7	0.353	1	24	7	0.353	1	32	4	0.239	0.99	15
127	L-lactate dehydrogenase A chain	P00338	3939	0	0	0	0	0	0	0	0	0	0	0	0	0	0	0	0
128	L-lactate dehydrogenase B chain	P07195	3945	0	0	0	0	0	0	0	0	0	0	0	0	0	0	0	0
129	L-lactate dehydrogenase C chain	P07864	3948	0	0	0	0	0	0	0	0	0	0	0	0	0	0	0	0
130	Apolipoprotein F	Q13790	319	1	0.0429	1	1	1	0.0429	0.99	1	0	0	0	0	0	0	0	0
131	Prostaglandin-H2 D-isomerase	P41222	5730	0	0	0	0	0	0	0	0	0	0	0	0	0	0	0	0
132	eIF-2-alpha kinase activator GCN1	Q92616	10985	0	0	0	0	0	0	0	0	0	0	0	0	2	0.0082	1	2
133	Plasma serine protease	P05154	5104	0	0	0	0	0	0	0	0	0	0	0	0	0	0	0	0
134	Apolipoprotein D	P05090	347	8	0.312	1	14	7	0.302	1	13	4	0.238	1	6	6	0.286	1	7
135	Complement component C8 beta chain	P07358	732	0	0	0	0	1	0.0152	0.03	1	0	0	0	0	0	0	0	0
136	Kallistatin	P29622	5267	0	0	0	0	1	0.0194	0.98	1	0	0	0	0	0	0	0	0
137	Lipopolysaccharide-binding protein	P18428	3929	0	0	0	0	0	0	0	0	1	0.0395	0.96	1	0	0	0	0
138	Extracellular matrix protein 1	Q16610	1893	1	0.0441	0.86	1	0	0	0	0	0	0	0	0	0	0	0	0
139	Adiponectin	Q15848	9370	0	0	0	0	0	0	0	0	0	0	0	0	1	0.0615	0.99	1
140	nudC domain-containing protein 2	Q8WVJ2	134492	1	0.121	1	1	0	0	0	0	0	0	0	0	2	0.268	1	2
141	Leucine-rich alpha-2-glycoprotein	P02750	116844	9	0.398	1	12	3	0.156	0.99	4	7	0.329	1	11	4	0.222	0.99	4
142	Coagulation factor XII	P00748	2161	1	0.0293	0.62	1	2	0.0537	0.83	3	1	0.0293	0.72	1	0	0	0	0
143	Attractin	O75882	8455	0	0	0	0	0	0	0	0	0	0	0	0	0	0	0	0
144	Cysteine-rich secretory protein 3	P54108	10321	0	0	0	0	0	0	0	0	0	0	0	0	0	0	0	0
145	CD5 antigen-like isoform 2	O43866	922	0	0	0	0	0	0	0	0	0	0	0	0	0	0	0	0
146	Fibulin-1	P23142	2192	0	0	0	0	0	0	0	0	0	0	0	0	0	0	0	0
147	Intraflagellar transport protein 74 homolog	Q96LB3	80173	0	0	0	0	0	0	0	0	0	0	0	0	0	0	0	0
148	Cystatin-A	P01040	1475	0	0	0	0	0	0	0	0	0	0	0	0	0	0	0	0
149	Spectrin beta chain, non-erythrocytic 4 isoform sigma1	Q9H254	57731	0	0	0	0	0	0	0	0	2	0.0199	1	2	0	0	0	0
150	Complement factor H-related protein 3	Q02985	10878	1	0.0372	0.01	1	2	0.1	0.98	2	1	0.0372	0.01	1	1	0.0372	0.01	1
151	Glutathione peroxidase 3	P22352	2878	3	0.196	0.78	6	3	0.196	0.78	4	3	0.136	0.64	4	4	0.247	1	7
152	Thyroxine-binding globulin	P05543	6906	1	0.0241	0.09	1	2	0.041	0.52	2	0	0	0	0	0	0	0	0
153	Tyrosine-protein kinase PRAG1	Q86YV5	157285	2	0.0405	1	2	0	0	0	0	0	0	0	0	0	0	0	0
154	14-3-3 protein zeta/delta	P63104	7534	0	0	0	0	0	0	0	0	0	0	0	0	0	0	0	0
155	Immunoglobulin lambda-like polypeptide 5	B9A064	100423062	0	0	0	0	0	0	0	0	0	0	0	0	0	0	0	0
156	Hepatocyte growth factor activator	Q04756	3083	0	0	0	0	0	0	0	0	0	0	0	0	0	0	0	0
157	Histone-lysine N-methyltransferase 2A	Q03164	4297	0	0	0	0	0	0	0	0	0	0	0	0	2	0.0053	1	2
158	Serum paraoxonase/lactonase 3	Q15166	5446	3	0.0904	1	4	3	0.0904	1	3	2	0.0452	0.01	2	0	0	0	0
159	Complement C1r subcomponent-like protein	Q9NZP8	51279	0	0	0	0	1	0.0246	0.02	1	1	0.0246	0.02	1	0	0	0	0
160	Neutrophil defensin 1	P59665	1667	0	0	0	0	0	0	0	0	0	0	0	0	0	0	0	0
161	Neutrophil defensin 3	P59666	1668	0	0	0	0	0	0	0	0	0	0	0	0	0	0	0	0
162	Hepatocyte growth factor-like protein	P26927	4485	0	0	0	0	0	0	0	0	0	0	0	0	0	0	0	0
163	Out at first protein homolog	Q86UD1	220323	0	0	0	0	0	0	0	0	0	0	0	0	0	0	0	0
164	Mannose-binding protein C	P11226	4153	0	0	0	0	0	0	0	0	0	0	0	0	0	0	0	0
165	Hyaluronan-binding protein 2	Q14520	3026	0	0	0	0	0	0	0	0	0	0	0	0	0	0	0	0
166	Carboxypeptidase N catalytic chain	P15169	1369	0	0	0	0	0	0	0	0	0	0	0	0	0	0	0	0
167	Biotinidase	P43251	686	0	0	0	0	0	0	0	0	0	0	0	0	0	0	0	0
